# Supplementary material for: Juan Eduardo Zúñiga
Source: Hindawi journal article supplement (doi:10.1155/2015/353828), 2003-01-01
Supplement: f1 [file 353828.f1.pdf]

## Supplementary file

Italian version

### QUESTIONARIO “COMUNICAZIONE DELLA DIAGNOSI”

Nome e cognome \_\_\_\_\_

Data di nascita \_\_\_\_\_

“Comunicare la diagnosi” e' uno degli atti medici più delicati nel rapporto medico-paziente.

Questo questionario è atto a valutare quanto lei sia rimasto soddisfatto da questo momento e, qualora presenti, gli aspetti negativi.

- 1) **A seguito dell'esordio dei sintomi, il suo neurologo curante ha deciso di disporre per:**
  - a. Ospedalizzazione
  - b. Ricovero in regime di Day-Hospital
  - c. Follow-up ambulatoriale
  
- 2) **Nella “comunicazione della diagnosi”, quale termine è stato utilizzato:**
  - a. Sindrome Clinicamente Isolata (CIS)
  - b. Possibile Sclerosi Multipla
  - c. Malattia infiammatoria/demielinizzante del Sistema Nervoso Centrale
  - d. Altro
  
- 3) **Quando pensa sia meglio affrontare la comunicazione della diagnosi da parte del suo neurologo?**
  - a. Sin dal sospetto iniziale, cioè dalla prima visita che ho fatto con lui
  - b. Già durante il ricovero o il Day Hospital, man mano che si procede con gli esami
  - c. È meglio rimandare la comunicazione della diagnosi ad una fase successiva al ricovero o ciclo di Day Hospital
  
- 4) **Dopo la comunicazione della diagnosi, preferirebbe:**
  - a. Essere subito informato circa l'evoluzione futura dei miei disturbi/malattia
  - b. Aspettare ulteriori conferme cliniche sulla diagnosi, prima di pensare alle possibili evoluzioni.
  - c. Essere supportato dal punto di vista psicologico.
  
- 5) **Ritiene che durante la comunicazione della diagnosi il suo neurologo abbia man mano considerato la sua:**

|                               |      |            |            |       |
|-------------------------------|------|------------|------------|-------|
| a. Emotività                  |      | poco       | abbastanza | molto |
| b. Età                        |      | poco       | abbastanza | molto |
| c. Situazione socio-economico | poco | abbastanza | molto      |       |
| d. Situazione psicologica     | poco | abbastanza | molto      |       |
  
- 6) **Cosa ritiene abbia interferito maggiormente durante i momenti in cui ti è stata comunicata la diagnosi?**

|                                                                   |      |            |       |
|-------------------------------------------------------------------|------|------------|-------|
| a. Il fattore tempo                                               | poco | abbastanza | molto |
| b. Inadeguatezza degli spazi                                      | poco | abbastanza | molto |
| c. Difficoltà nello stabilire una relazione tra paziente e medico | poco | abbastanza | molto |
  
- 7) **Come e dove è avvenuta la “comunicazione della diagnosi”:**
  - a. Nella mia camera di ospedale
  - b. In un incontro riservato nello studio medico
  - c. In più di un incontro, nello studio medico
  - d. In uno spazio comune nel reparto
  - e. Telefonicamente
  - f. Tramite lettera di dimissione
  
- 8) **Quanto tempo è stato dedicato complessivamente alla “comunicazione della diagnosi”?**
  - a. Meno di 15 minuti
  - b. Tra 15 e 30 minuti
  - c. Tra 30 e 60 minuti
  - d. Più di un'ora

- 9) **Chi era presente con lei alla “comunicazione della diagnosi”?**
- Nessuno, ero solo/a
  - Vi era un mio parente (genitore fratello-sorella)
  - Vi erano 2 o più parenti
  - Vi erano uno o più altre persone (non parenti)
- 10) **In genere che cosa ritiene sia preferibile durante il primo incontro in cui le è stata comunicata la diagnosi?**
- Avere informazioni sommarie senza entrare troppo nel dettaglio
  - Essere rassicurati
  - Massima trasparenza ed essere informato circa le implicazioni future
  - Avere oltre alla diagnosi una adeguata informazione sulle terapie
- 11) **Ritiene sia utile la presenza di uno psicologo durante il colloquio di “comunicazione della diagnosi”?**
- No, preferisco affrontare da solo il momento della comunicazione della diagnosi.
  - Sì, ritengo possa essere utile la presenza di uno psicologo per aiutare il neurologo nel comprendere e gestire la modalità di comunicazione con il paziente
  - Sì, ritengo possa essere utile la presenza di uno psicologo per aiutarmi a gestire i problemi emozionali conseguenti alla comunicazione della diagnosi
- 12) **Durante la “comunicazione della diagnosi”, avrebbe preferito fosse stato utilizzato materiale informativo di supporto?**
- No, preferisco ricevere le informazioni necessarie direttamente dal medico
  - Sì, avrebbe potuto essermi utile per integrare le informazioni ricevute ed avere una migliore comprensione della malattia
  - No, ho cercato altre informazioni su Internet-altro
- 13) **Secondo lei, qual è la modalità di comportamento migliore nel rapporto medico-paziente?**
- È il medico che deve decidere cosa sia meglio fare in merito sia agli esami sia alla terapia
  - Il medico deve spiegare il proprio orientamento, ma decidere cosa fare solo dopo aver sentito il parere del paziente, in modo che la scelta sia condivisa
  - Il medico deve sempre spiegare il proprio orientamento, ma lasciare la decisione finale al paziente senza influenzarlo
  - Il medico deve spiegare in modo obiettivo le possibili scelte, senza esprimere il proprio parere, in modo da lasciare completamente libero il paziente nella scelta finale
- 14) **Dopo la comunicazione della diagnosi hai avuto la sensazione di:**
- Non aver ricevuto un sufficiente supporto emotivo
  - Che il medico sia stato abbastanza disponibile nel comprendere e rispondere alle mie aspettative
  - Che il medico abbia gestito in maniera esaustiva le mie necessità
- 15) **A suo parere, ritiene che vi sia stata una “comunicazione personalizzata” da parte della equipe che l’ha seguita, durante il processo diagnostico-terapeutico?**
- No
  - Sì, un po’
  - Sì, discretamente
  - Sì, molto
- 16) **Dopo la “comunicazione della diagnosi” ha avuto la consapevolezza di essere stato esaurientemente informato sulla sua malattia?**
- No
  - Sì, un po’
  - Sì, discretamente
  - Sì, molto
- 17) **Parteciperebbe ad incontri di approfondimento sulla sua diagnosi/malattia con altri malati che hanno avuto la sua stessa esperienza?**
- Sì, solo con altre persone che hanno avuto il mio stesso problema per eventuali confronti
  - Sì, ma con la presenza del neurologo
  - Sì, ma con la presenza dello psicologo
  - No

English version

## “DIAGNOSIS COMMUNICATION” SURVEY

Name and Surname \_\_\_\_\_

Date of Birth \_\_\_\_\_

The communication of the diagnosis is considered a critical moment of the physician-patient relationship. This survey is designed to assess the satisfaction and the eventual issues about the diagnostic process.

**1) After the onset of symptoms, your neurologist recommended for:**

- a. Hospitalization
- b. Day-Hospital
- c. Outpatient follow-up

**2) During the communication of the diagnosis your neurologist used the term:**

- a. Clinically Isolated Syndrome (CIS)
- b. Possible Multiple Sclerosis
- c. Inflammatory/demyelinating CNS
- d. Other

**3) When do you think it's better to receive the communication of the diagnosis?**

- a. Since the first visit, if clinical condition was suggestive
- b. During hospitalization or day hospital, after the diagnostic exams
- c. It's better to put off the communication of the diagnosis till after the end of hospital/Day Hospital stay

**4) After the disclosure of the diagnosis, you'd prefer:**

- a. To be immediately informed about the possible future evolution of my disease
- b. To have further clinical and instrumental information confirming the diagnosis before being informed about the possible future evolution of the disease
- c. To receive psychological support

**5) Do you think that, during the communication of the diagnosis, your neurologist considered:**

- |                            |        |        |      |
|----------------------------|--------|--------|------|
| a. Emotional aspects       | little | enough | much |
| b. Age                     | little | enough | much |
| c. Socio-economic state    | little | enough | much |
| d. Psychological condition | little | enough | much |

**6) What has influenced the most the communication of the diagnosis?**

- |                                           |        |        |      |
|-------------------------------------------|--------|--------|------|
| a. time                                   | little | enough | much |
| b. Inadequate setting                     | little | enough | much |
| c. Difficult relationship with the doctor | little | enough | much |

**7) Where the communication of the diagnosis took place?**

- a. Room of the hospital
- b. Private setting, during a single visit
- c. Private setting, during the course of a series of visits
- d. Department open-space

- e. By phone
- f. By discharge letter

**8) How much time has the neurologist spent to communicate the diagnosis?**

- a. Less than 15 minutes
- b. Between 15 and 30 minutes
- c. Between 30 and 60 minutes
- d. More than one hour

**9) Was any other person present when you received the diagnosis?**

- a. None
- b. A relative (parent-brother-sister)
- c. Two or more relatives
- d. one or more other persons (not relatives)

**10) What would you prefer to know at the beginning of the disclosure of the diagnosis process?**

- a. To receive general information with no specific details
- b. Reassurance
- c. To be informed about possible future implications
- d. To receive further information about the diagnosis and possible therapies

**11) Do you think the presence of a psychologist during the communication of the diagnosis would be useful?**

- a. No, I'd prefer to be alone during the diagnosis communication
- b. Yes, I think a psychologist could help the neurologist in the disclosure process
- c. Yes, I think a psychologist could help me to manage the emotional problems related to the communication of the diagnosis

**12) Do you think it could be useful to receive an information aid (leaflet, book, etc) after the disclosure of the diagnosis?**

- a. No, I prefer to receive information from the neurologist
- b. Yes, it could be useful

**13) In your opinion, how should the doctor-patient relationship be modelled?**

- a. The doctor has to choose diagnostic exams to be performed and therapeutic strategies
- b. The physician should explain his own opinions and come to a decision together with the patient
- c. The physician should explain his own opinions, but the patient has the final decision
- d. The physician should explain objectively all the diagnostic/therapeutic possibilities and the patient should come to a decision without any conditioning

**14) After the disclosure of the diagnosis, you feel like:**

- a. You have not received sufficient emotional support
- b. The doctor understood your emotional state and fulfilled your expectations
- c. The doctor met all my needs

**15) In your opinion, you believe to have received a "personalized communication"?**

- a) No

- b) Yes, a little
- c) Yes, fairly
- d) Yes, very much

**16) Do you think you have been informed adequately about the disease during the communication of the diagnosis"?**

- a. No
- b. Yes, a bit '
- c. Yes, discreetly
- d. Yes, very

**17) Would you take part in public meetings held by other patients sharing their experiences?**

- a. Yes, only with people with the same problem
- b. Yes, but with the presence of the neurologist
- c. Yes, but with the presence of the psychologist
- d. No
